# Supplementary material for: Treatment of severe acute respiratory syndrome (SARS), Middle East respiratory syndrome (MERS), and coronavirus disease 2019 (COVID-19): a systematic review of in vitro, in vivo, and clinical trials
Source: PubMed Central journal article supplement (PMC7738873; doi:10.7150/thno.48342), 2021-01-01
Supplement: thnov11p1207s1.pdf [file thnov11p1207s1.pdf]

## **Supplementary Material**

Treatment of severe acute respiratory syndrome (SARS), Middle East respiratory syndrome (MERS), and coronavirus disease 2019 (COVID-19): a systematic review of *in vitro*, *in vivo*, and clinical trials. Young Joo Han, Keum Hwa Lee, Sojung Yoon, Seoung Wan Nam, Seohyun Ryu, Dawon Seong, Jae Seok Kim, Jun Young Lee, Jae Won Yang, Jinhee Lee, Ai Koyanagi, Sung Hwi Hong, Elena Dragioti, Joaquim Radua, Lee Smith, Hans Oh, Ramy Abou Ghayda, Andreas Kronbichler, Maria Effenberger, Daniela Kresse, Sara Denicolò, Woosun Kang, Louis Jacob, Hanwul Shin, and Jae Il Shin

**Table S1.** Therapeutic agents that showed no potent effects against SARS-CoV-2 in *in vitro* studies.

| Therapeutics                | First author | Findings                                                          |
|-----------------------------|--------------|-------------------------------------------------------------------|
| <b>Antiviral agents</b>     |              |                                                                   |
| Ribavirin                   | Wang [1]     | EC <sub>50</sub> = 109.5 μM; CC <sub>50</sub> > 400 μM; SI > 3.65 |
|                             | Choy [2]     | EC <sub>50</sub> > 500 μM; CC <sub>50</sub> > 100 μM              |
| Lopinavir                   | Choy [2]     | EC <sub>50</sub> = 26.1 μM; CC <sub>50</sub> > 49.75 μM           |
| Ritonavir                   | Choy [2]     | EC <sub>50</sub> > 100 μM; CC <sub>50</sub> > 48.91 μM            |
| Favipiravir                 | Wang [1]     | EC <sub>50</sub> = 61.88 μM; CC <sub>50</sub> > 400 μM; SI > 6.46 |
|                             | Choy [2]     | EC <sub>50</sub> > 100 μM; CC <sub>50</sub> > 100 μM              |
| Oseltamivir                 | Choy [2]     | EC <sub>50</sub> > 100 μM; CC <sub>50</sub> > 100 μM              |
|                             | Wang [3]     | Not effective                                                     |
| Galidesivir                 | Choy [2]     | EC <sub>50</sub> > 100 μM; CC <sub>50</sub> > 100 μM              |
| Tenofovir                   | Choy [2]     | Not effective                                                     |
| Baloxavir                   | Choy [2]     | EC <sub>50</sub> > 100 μM; CC <sub>50</sub> = 85.9 μM             |
|                             | Wang [3]     | Partial inhibition (up to 29%) at a high concentration of 50 μM   |
| Laninamivir                 | Wang [3]     | Not effective                                                     |
| Peramivir                   | Wang [3]     | Not effective                                                     |
| Zanamivir                   | Wang [3]     | Not effective                                                     |
| R-1479                      | Choy [2]     | Not effective                                                     |
| <b>Antibacterial agents</b> |              |                                                                   |
| Oritavancin                 | Choy [2]     | Not effective                                                     |
| Dalbavancin                 | Choy [2]     | Not effective                                                     |
| <b>Other agents</b>         |              |                                                                   |
| Nafamostat                  | Wang [1]     | EC <sub>50</sub> = 22.5 μM; CC <sub>50</sub> > 100 μM; SI > 4.44  |
| Chlorpromazine              | Choy [2]     | Not effective                                                     |
| Fludarabine                 | Choy [2]     | Not effective                                                     |

CC<sub>50</sub>: 50% cytotoxic concentration; COVID-19: coronavirus disease 2019; EC<sub>50</sub>: 50% maximal effective concentration; SI: selectivity index.

## References

1. Wang M, Cao R, Zhang L, Yang X, Liu J, Xu M, et al. Remdesivir and chloroquine effectively inhibit the recently emerged novel coronavirus (2019-nCoV) in vitro. *Cell Res.* 2020; 30: 269-71.
2. Choy KT, Wong AY, Kaewpreedee P, Sia SF, Chen D, Hui KPY, et al. Remdesivir, lopinavir, emetine, and homoharringtonine inhibit SARS-CoV-2 replication in vitro. *Antiviral Res.* 2020; 178: 104786.
3. Wang X, Cao R, Zhang H, Liu J, Xu M, Hu H, et al. The anti-influenza virus drug, arbidol is an efficient inhibitor of SARS-CoV-2 in vitro. *Cell Discov.* 2020; 6: 28.
